# Supplementary material for: Th17-related mammary immunity, but not a high systemic Th1 immune response is associated with protection against E. coli mastitis
Source: PubMed Central journal article supplement (PMC7686320; doi:10.1038/s41541-020-00258-4), 2020-11-24
Supplement: 41541_2020_258_MOESM1_ESM.pdf [file 41541_2020_258_MOESM1_ESM.pdf]

## Supplemental data

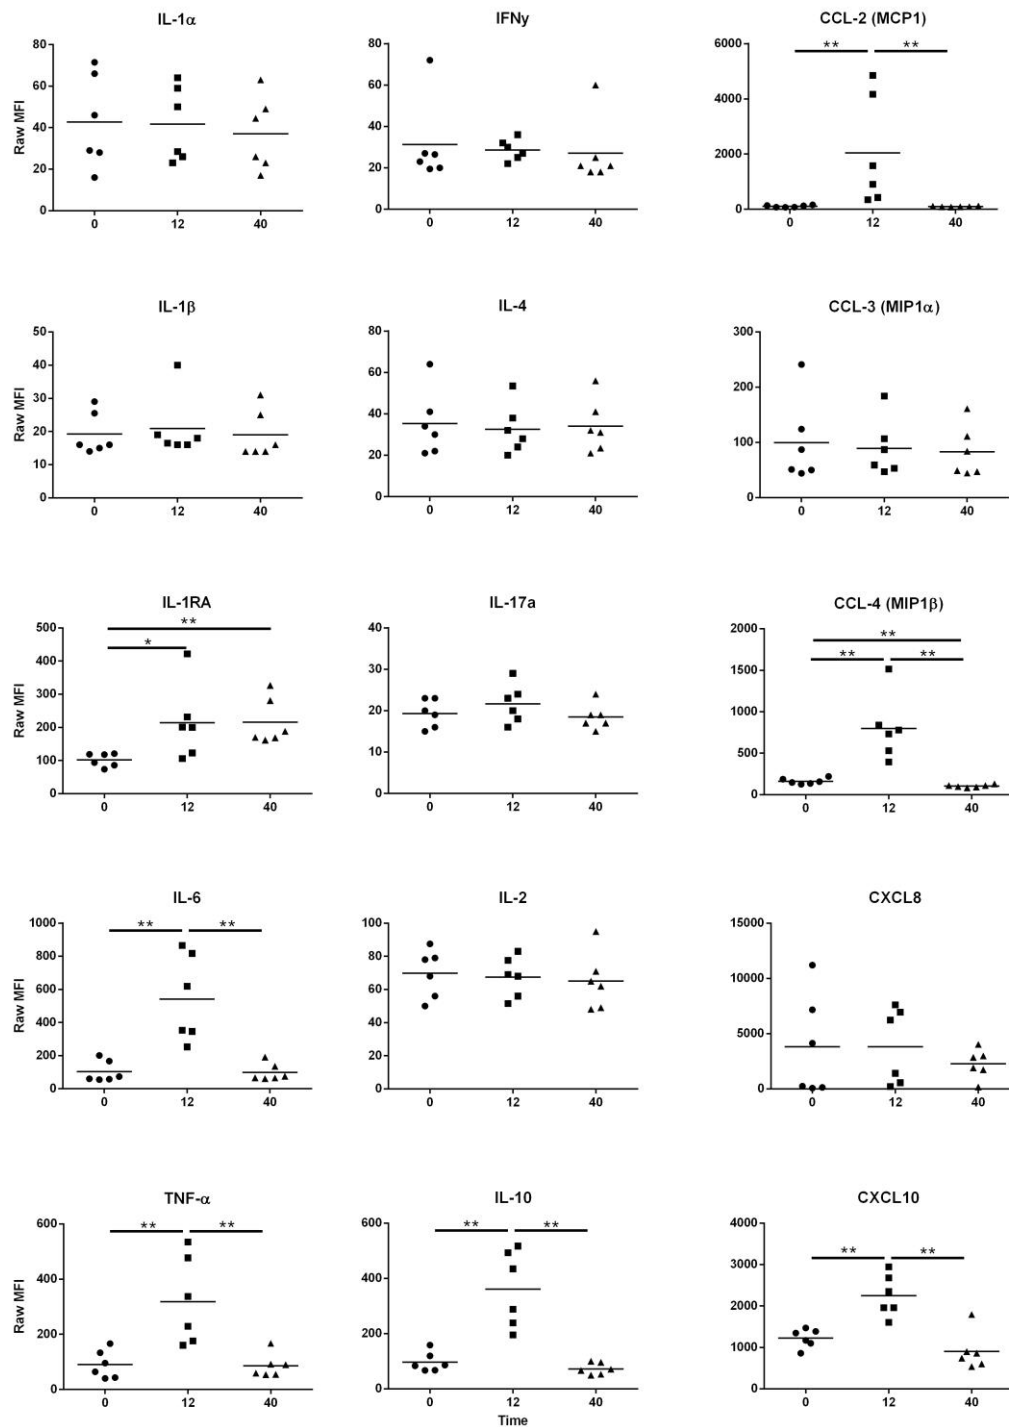

**Supplementary Figure 1. Blood cytokine profile in control cows during the *E. coli* mastitis course at three time points.** Dot plot with mean and individual values of plasma cytokine concentrations of control cows at 0, 12, and 40 hpi are shown. Measures are expressed as raw mean fluorescence intensity (MFI) using a Custom bovine cytokines MilliPlex assay. Statistical analysis was done with Kruskal wallis and only significant differences (\* : p<0.05 ; \*\* : p<0.01 ; \*\*\* : p<0.001) are shown.

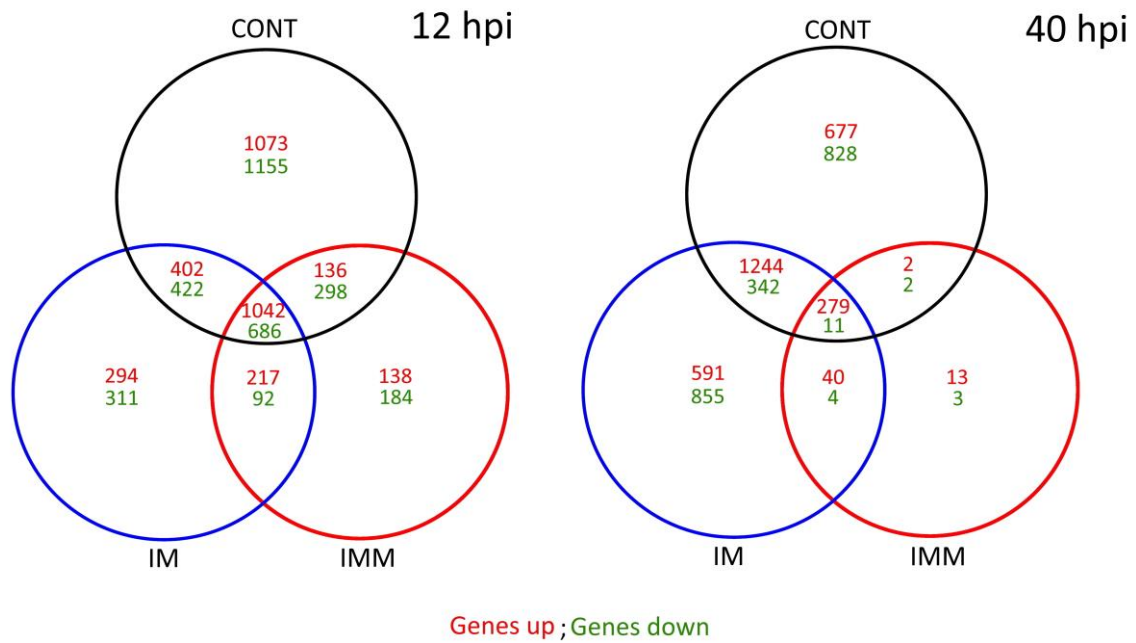

**Supplementary Figure 2. Number of differentially-expressed genes amongst control and immunized cows at 12 and 40 hpi compared to expression at 0 hpi during the *E. coli* mastitis course.** DEGs between time points were assessed in each group using Deseq2. Venn diagram of identified genes in control, intramuscular- and intramammary-immunized groups at 12 hpi (a) at 40 hpi (b) are shown with the number of genes and the direction of changes presented between conditions.

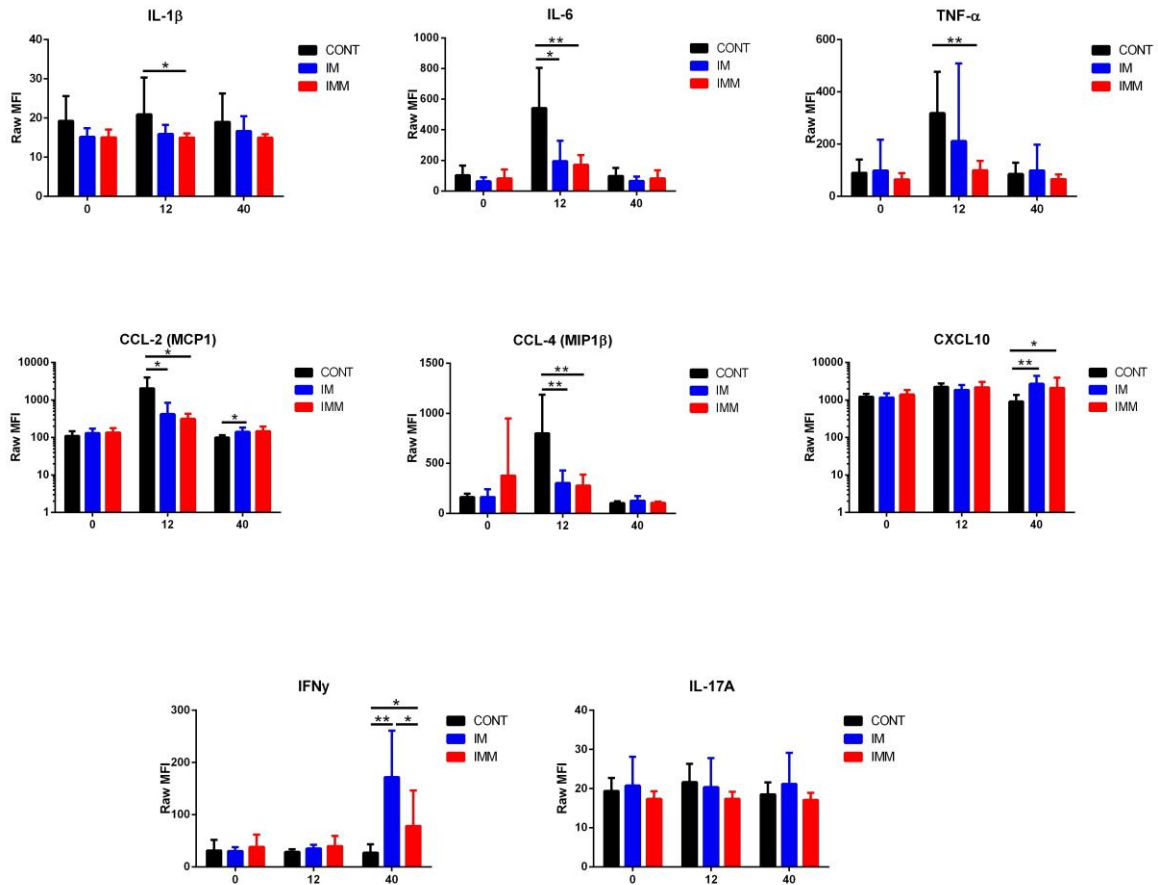

**Supplementary Figure 3. Cytokine profiles in plasma of control and immunized cows during the *E. coli* mastitis course.** Measures are expressed as raw mean fluorescence intensity (MFI) using a Custom bovine cytokines Milliplex assay and presented as barplots with mean and standard deviation for control and immunized cows at 0, 12, and 40 hpi. Only significant differences are shown after statistical analysis ( Krustal wallis (\* :  $p < 0.05$  ; \*\* :  $p < 0.01$  ; \*\*\* :  $p < 0.001$ )).

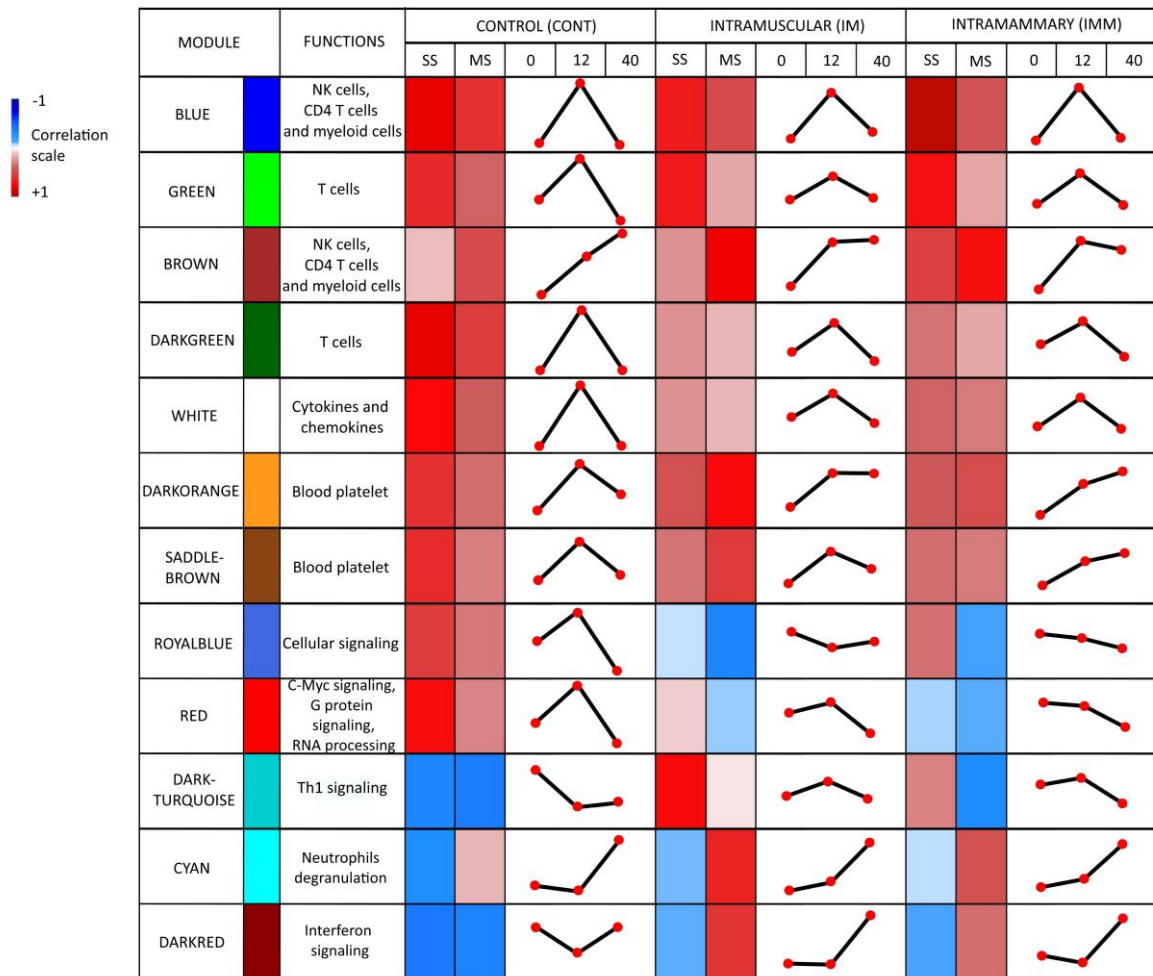

**Supplementary Figure 4. Weighted correlation network analysis (WGCNA) of control and immunized cows during *E. coli* mastitis.** Only modules with at least 30 genes were retained. Module activation is presented according to the time. Blue and red colors are for modules correlating with the mammary (MS) and the systemic (SS) score, respectively. Functions of each module were determined using the GSEA method.

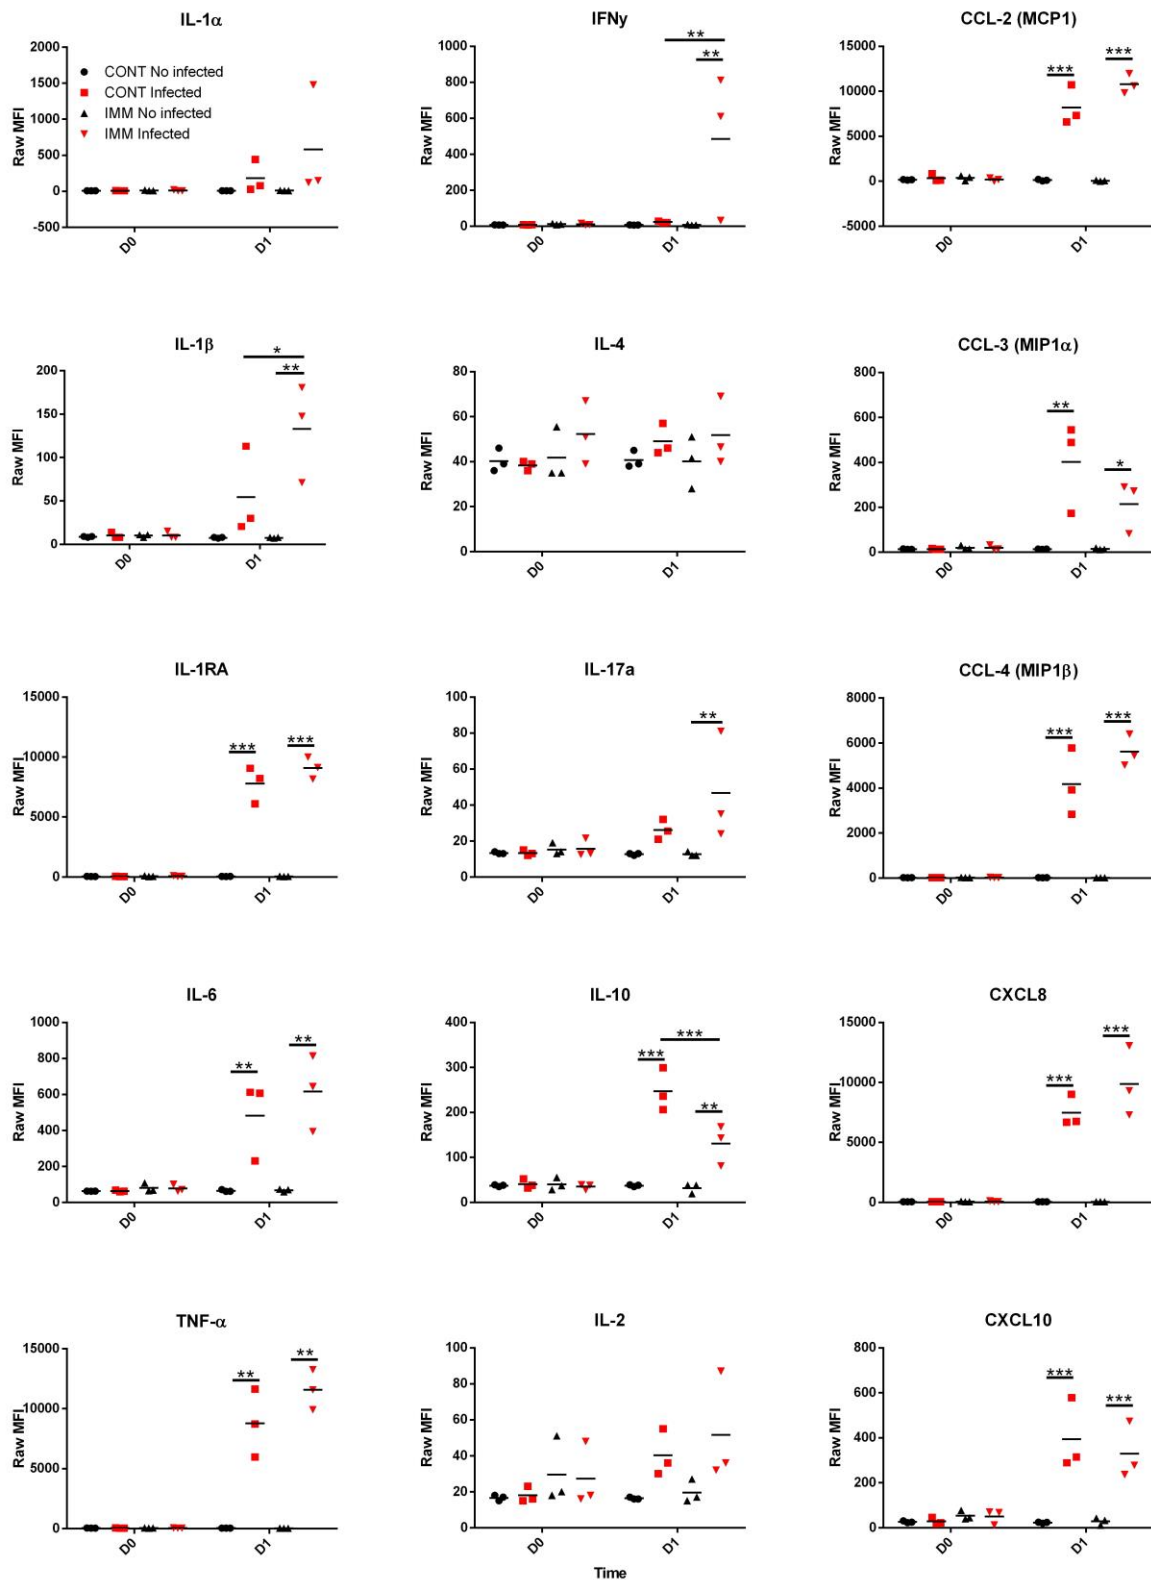

**Supplementary Figure 5. Cytokine profile in milk of control and immunized cows during *E. coli* mastitis.** Measures are expressed as raw mean fluorescence intensity (MFI) using a Custom bovine cytokines MilliPlex assay and presented as individual values with the mean, for control and immunized groups at 0 and 16 hpi in milk of non-infected and challenged quarters. Statistical analysis was done with Kruskal wallis and only significant differences are shown (\* :  $p < 0.05$  ; \*\* :  $p < 0.01$  ; \*\*\* :  $p < 0.001$ )

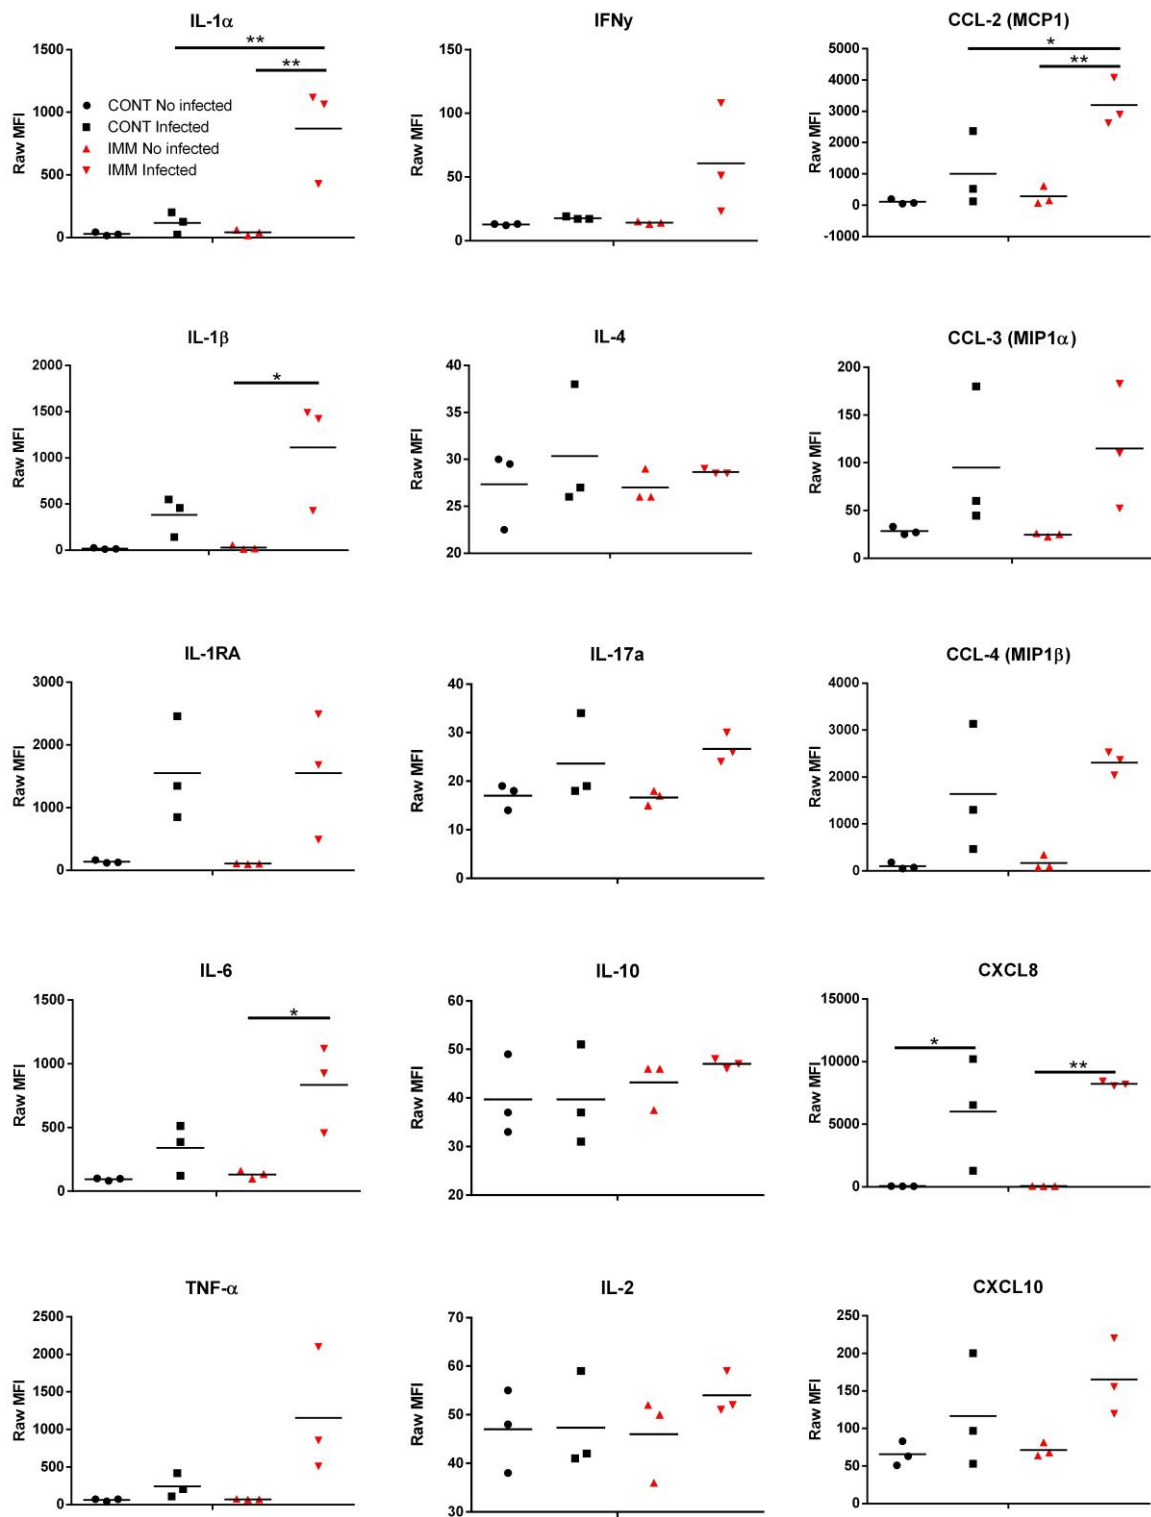

**Supplementary Figure 6. Cytokine profile in mammary tissue of control and immunized cows during *E. coli* mastitis.** Measures are expressed as raw mean fluorescence intensity (MFI) using a Custom bovine cytokines MilliPlex assay and are presented as individual values with the mean, for control and immunized groups in non-infected and challenged quarters. Statistical analysis was done with Kruskal wallis and only significant differences are shown (\* : p < 0.05 ; \*\* : p < 0.01 ; \*\*\* : p < 0.001)

**Supplementary Table 1. Reads numbers of each sample at each time (Expression in millions)**

| animal | group | time   | Reads mapped number (x milions) | % mapped reads |
|--------|-------|--------|---------------------------------|----------------|
| 274    | CONT  | 0 hpi  | 5.77113                         | 92.18          |
| 275    | CONT  | 0 hpi  | 9.206225                        | 87.7           |
| 279    | IM    | 0 hpi  | 11.877493                       | 87.8           |
| 281    | IM    | 0 hpi  | 11.210751                       | 93.9           |
| 282    | CONT  | 0 hpi  | 6.700487                        | 83.6           |
| 283    | IMM   | 0 hpi  | 14.652107                       | 91.49          |
| 284    | IMM   | 0 hpi  | 12.326351                       | 93.27          |
| 286    | IM    | 0 hpi  | 12.137065                       | 92.53          |
| 289    | IM    | 0 hpi  | 8.285817                        | 91.7           |
| 292    | IMM   | 0 hpi  | 6.608721                        | 91.6           |
| 293    | CONT  | 0 hpi  | 11.987429                       | 92.7           |
| 297    | CONT  | 0 hpi  | 9.07678                         | 91.6           |
| 3725   | IMM   | 0 hpi  | 6.279465                        | 91.6           |
| 3727   | IM    | 0 hpi  | 11.138122                       | 86.47          |
| 3729   | CONT  | 0 hpi  | 9.444594                        | 94             |
| 3732   | IM    | 0 hpi  | 10.507804                       | 84.94          |
| 3734   | IMM   | 0 hpi  | 9.274266                        | 92.1           |
| 3735   | IMM   | 0 hpi  | 11.806309                       | 87.6           |
| 274    | CONT  | 12 hpi | 9.627493                        | 88.7           |
| 275    | CONT  | 12 hpi | 5.42378                         | 91.6           |
| 279    | IM    | 12 hpi | 11.323308                       | 90.86          |
| 281    | IM    | 12 hpi | 6.058263                        | 93.22          |
| 282    | CONT  | 12 hpi | 7.686087                        | 89.61          |
| 283    | IMM   | 12 hpi | 9.771432                        | 89.59          |
| 284    | IMM   | 12 hpi | 11.752525                       | 90.13          |
| 286    | IM    | 12 hpi | 5.391165                        | 93.77          |
| 289    | IM    | 12 hpi | 10.610801                       | 92.37          |
| 292    | IMM   | 12 hpi | 11.362103                       | 92.53          |
| 297    | CONT  | 12 hpi | 9.981453                        | 90.04          |
| 3725   | IMM   | 12 hpi | 14.206376                       | 93.67          |
| 3727   | IM    | 12 hpi | 12.614888                       | 89.92          |
| 3729   | CONT  | 12 hpi | 8.730695                        | 90.49          |
| 3732   | IM    | 12 hpi | 9.186363                        | 78.02          |
| 3734   | IMM   | 12 hpi | 10.152582                       | 92.1           |
| 3735   | IMM   | 12 hpi | 10.334289                       | 92.1           |
| 274    | CONT  | 40 hpi | 13.612505                       | 94.48          |
| 275    | CONT  | 40 hpi | 12.064725                       | 90.96          |
| 279    | IM    | 40 hpi | 14.373269                       | 94.03          |
| 281    | IM    | 40 hpi | 11.494359                       | 91.16          |
| 282    | CONT  | 40 hpi | 8.456053                        | 86.88          |

|      |      |        |           |       |
|------|------|--------|-----------|-------|
| 283  | IMM  | 40 hpi | 9.527324  | 93.9  |
| 284  | IMM  | 40 hpi | 11.313552 | 92.1  |
| 286  | IM   | 40 hpi | 15.885142 | 90.66 |
| 289  | IM   | 40 hpi | 9.426813  | 93.4  |
| 292  | IMM  | 40 hpi | 6.478535  | 92.21 |
| 293  | CONT | 40 hpi | 9.940772  | 90.4  |
| 297  | CONT | 40 hpi | 10.033062 | 77.8  |
| 3725 | IMM  | 40 hpi | 12.385064 | 93.74 |
| 3727 | IM   | 40 hpi | 8.493025  | 93.63 |
| 3729 | CONT | 40 hpi | 11.50606  | 90.1  |
| 3732 | IM   | 40 hpi | 15.201339 | 87.6  |
| 3734 | IMM  | 40 hpi | 12.364367 | 90.03 |
| 3735 | IMM  | 40 hpi | 11.176495 | 87.64 |
| 274  | CONT | B7     | 9.38013   | 93.51 |
| 275  | CONT | B7     | 11.122096 | 90.27 |
| 279  | IM   | B7     | 7.476581  | 91.44 |
| 283  | IMM  | B7     | 13.88473  | 91.07 |
| 284  | IMM  | B7     | 6.078106  | 93.78 |
| 286  | IM   | B7     | 9.42854   | 91.61 |
| 289  | IM   | B7     | 4.85905   | 92.21 |
| 292  | IMM  | B7     | 11.15113  | 94.4  |
| 293  | CONT | B7     | 10.791246 | 91.72 |
| 297  | CONT | B7     | 9.519881  | 80.02 |
| 3725 | IMM  | B7     | 10.55349  | 91.08 |
| 3727 | IM   | B7     | 10.272195 | 92.31 |
| 3729 | CONT | B7     | 12.610108 | 93.15 |
| 3732 | IM   | B7     | 9.782585  | 84.27 |
| 3734 | IMM  | B7     | 12.731626 | 92.33 |
| 3735 | IMM  | B7     | 9.572695  | 79.85 |
| 274  | CONT | I0     | 8.492296  | 90.81 |
| 275  | CONT | I0     | 7.96908   | 88.23 |
| 279  | IM   | I0     | 13.671551 | 87.26 |
| 281  | IM   | I0     | 12.873443 | 89.47 |
| 282  | CONT | I0     | 10.279045 | 83.71 |
| 283  | IMM  | I0     | 13.358223 | 90.5  |
| 284  | IMM  | I0     | 11.070205 | 88.58 |
| 286  | IM   | I0     | 8.797038  | 91.73 |
| 289  | IM   | I0     | 13.204483 | 89.35 |
| 292  | IMM  | I0     | 10.715812 | 85.81 |
| 293  | CONT | I0     | 12.608356 | 92.16 |
| 297  | CONT | I0     | 14.406925 | 92.31 |
| 3725 | IMM  | I0     | 8.397915  | 90.78 |
| 3727 | IM   | I0     | 10.330763 | 89.39 |
| 3729 | CONT | I0     | 15.504844 | 92.85 |
| 3732 | IM   | I0     | 11.790845 | 91.7  |



|      |      |    |           |       |
|------|------|----|-----------|-------|
| 3734 | IMM  | I0 | 10.390356 | 91.24 |
| 3735 | IMM  | I0 | 10.188433 | 93.34 |
| 274  | CONT | I7 | 8.456255  | 86.06 |
| 275  | CONT | I7 | 10.281408 | 92.33 |
| 279  | IM   | I7 | 10.228077 | 89.6  |
| 281  | IM   | I7 | 10.250527 | 90.44 |
| 282  | CONT | I7 | 13.761794 | 87.97 |
| 283  | IMM  | I7 | 12.322651 | 92.3  |
| 284  | IMM  | I7 | 13.846079 | 91.56 |
| 286  | IM   | I7 | 11.010188 | 91.99 |
| 289  | IM   | I7 | 13.940961 | 92.78 |
| 292  | IMM  | I7 | 12.354945 | 90.63 |
| 293  | CONT | I7 | 11.328832 | 92.36 |
| 297  | CONT | I7 | 12.745967 | 93.37 |
| 3725 | IMM  | I7 | 13.617075 | 92.38 |
| 3727 | IM   | I7 | 6.735543  | 91.42 |
| 3729 | CONT | I7 | 12.29389  | 90.21 |
| 3732 | IM   | I7 | 7.564474  | 88.89 |
| 3734 | IMM  | I7 | 9.17878   | 91.5  |
| 3735 | IMM  | I7 | 12.332537 | 92.87 |

**Supplementary Table 2 Top 10 genes up or down regulated in control group after DESeq2 comparison between 0 hpi and 12 hpi.**

| T12vsT0 (up)   | Gene Symbol | Log2FoldChange | Q-value   |
|----------------|-------------|----------------|-----------|
| 1              | PTX3        | 10,66          | 1,48E-221 |
| 2              | TNFAIP6     | 5,51           | 1,31E-69  |
| 3              | ALPL        | 6,97           | 9,08E-65  |
| 4              | DNAJB1      | 3,83           | 6,02E-58  |
| 5              | SLCO4A1     | 4,09           | 1,27E-56  |
| 6              | HSPA1A      | 5,66           | 1,08E-50  |
| 7              | HSPH1       | 4,92           | 1,74E-46  |
| 8              | IL1RAP      | 4,2            | 1,27E-45  |
| 9              | IL18R1      | 4,11           | 3,53E-45  |
| 10             | RAB3IP      | 4,53           | 6,45E-42  |
| T12vsT0 (down) |             |                |           |
| 1              | GDA         | -6,14          | 2,51E-88  |
| 2              | CTSB        | -3,08          | 5,90E-77  |
| 3              | TNFSF13     | -4,18          | 5,03E-60  |
| 4              | CALCRL      | -6,12          | 2,23E-58  |
| 5              | CKB         | -3,76          | 5,04E-53  |
| 6              | GM2A        | -3             | 9,40E-53  |
| 7              | IGSF8       | -2,63          | 2,82E-51  |
| 8              | CCR2        | -2,78          | 4,78E-51  |
| 9              | NLRP1       | -5,53          | 9,24E-46  |
| 10             | CSF1R       | -3,65          | 4,95E-42  |

| T40vsT0 (up)   | Gene Symbol | Log2FoldChange | Q-value  |
|----------------|-------------|----------------|----------|
| 1              | SHROOM4     | 5,25           | 9,21E-49 |
| 2              | KBTBD7      | 3,12           | 9,21E-49 |
| 3              | HIST1H1C    | 3,08           | 7,95E-47 |
| 4              | SLC25A37    | 2,92           | 3,36E-43 |
| 5              | FOXRED1     | 2,44           | 8,69E-43 |
| 6              | ALOX5AP     | 3,44           | 2,91E-40 |
| 7              | RYR1        | 4,31           | 4,73E-39 |
| 8              | KREMEN1     | 3,83           | 6,42E-38 |
| 9              | IL2RA       | 2,42           | 1,42E-35 |
| 10             | PTPN5       | 3,24           | 4,28E-35 |
| T40vsT0 (down) |             |                |          |
| 1              | DAB2        | -3,35          | 4,84E-11 |
| 2              | STEAP4      | -2,01          | 4,01E-09 |
| 3              | TPC3        | -2,36          | 2,46E-05 |
| 4              | GRIA3       | -4,79          | 2,46E-05 |
| 5              | CACNA2D1    | -4,97          | 2,51E-05 |
| 6              | ZFYVE28     | -2,68          | 3,51E-05 |
| 7              | CDH10       | -3,05          | 9,07E-05 |
| 8              | CPB2        | -2,27          | 0,0001   |
| 9              | UNC5A       | -2,56          | 0,0001   |
| 10             | IGFBP1      | -2,84          | 0,0001   |

**Supplementary Table 3 Top 10 genes up or down modulated in IM group after DESeq2 comparison between 0 hpi and 12 hpi and 0 hpi and 40 hpi**

| IM T12vsT0 (up)   | Gene Symbol | Log2FoldChange | Q-value  |
|-------------------|-------------|----------------|----------|
| 1                 | SERPINB4    | 9,53           | 9,55E-45 |
| 2                 | PTX3        | 10,48          | 1,53E-40 |
| 3                 | SOCS3       | 2,58           | 1,17E-37 |
| 4                 | TCN1        | 3,59           | 1,23E-34 |
| 5                 | SHROOM4     | 4,88           | 1,71E-29 |
| 6                 | RAB3IP      | 4,55           | 8,71E-29 |
| 7                 | RAB20       | 3,99           | 1,57E-28 |
| 8                 | MEGF9       | 3,41           | 1,61E-28 |
| 9                 | MMP9        | 4,14           | 6,80E-28 |
| 10                | CPNE2       | 4,72           | 5,44E-27 |
| IM T12vsT0 (down) |             |                |          |
| 1                 | IFT27       | -2,45          | 7,70E-10 |
| 2                 | CDH10       | -3,85          | 1,43E-08 |
| 3                 | PDK4        | -2,12          | 1,91E-08 |
| 4                 | BATF2       | -3,21          | 2,99E-08 |
| 5                 | CD1A        | -3,5           | 4,06E-08 |
| 6                 | USHBP1      | -2,31          | 3,80E-06 |
| 7                 | IGFBP1      | -5,19          | 1,46E-05 |
| 8                 | SIPA1L2     | -2,64          | 1,78E-05 |
| 9                 | SIGLEC1     | -2,24          | 1,94E-05 |
| 10                | KLHL33      | -2,57          | 2,85E-05 |

| IM T40vsT0 (up)   | Gene Symbol | Log2FoldChange | Q-value  |
|-------------------|-------------|----------------|----------|
| 1                 | KBTBD7      | 2,58           | 2,27E-61 |
| 2                 | SLC25A37    | 2,71           | 2,73E-45 |
| 3                 | TCN1        | 3,77           | 1,83E-44 |
| 4                 | APOBEC3Z1   | 3,43           | 8,68E-42 |
| 5                 | RSAD2       | 2,97           | 6,97E-41 |
| 6                 | SLC28A3     | 3,84           | 6,07E-39 |
| 7                 | CD24        | 2,61           | 2,38E-38 |
| 8                 | OAS1X       | 2,44           | 2,10E-37 |
| 9                 | FOXRED1     | 2,21           | 1,39E-35 |
| 10                | SHROOM4     | 4,87           | 6,16E-35 |
| IM T40vsT0 (down) |             |                |          |
| 1                 | ZFYVE28     | -3             | 9,72E-22 |
| 2                 | CD209       | -3,4           | 3,84E-11 |
| 3                 | UNC5A       | -4,05          | 9,70E-10 |
| 4                 | ELANE       | -2,63          | 2,60E-07 |
| 5                 | SLC4A3      | -2,45          | 2,58E-05 |
| 6                 | COL9A2      | -4,23          | 0,0001   |
| 7                 | IGFBP1      | -3,24          | 0,0001   |
| 8                 | DAB2        | -3,67          | 0,0001   |
| 9                 | PCDH8       | -4,28          | 0,0002   |
| 10                | ADAM28      | -2,4           | 0,0003   |

**Supplementary table 4 Top 10 genes up or down modulated in IMM group after DESeq2 comparison between 0 hpi and 12 hpi and 0 hpi and 40 hpi.**

| IMM T12vsT0 (up)   | Gene Symbol | Log2FoldChange | Q-value  |
|--------------------|-------------|----------------|----------|
| 1                  | PTX3        | 9,25           | 4,36E-33 |
| 2                  | SOCS3       | 2,57           | 5,00E-33 |
| 3                  | SLCO4A1     | 3,39           | 1,21E-31 |
| 4                  | MMP9        | 3,72           | 2,12E-31 |
| 5                  | SERPINB4    | 8,49           | 1,59E-24 |
| 6                  | RAB20       | 3,64           | 7,95E-23 |
| 7                  | RAB3IP      | 3,78           | 3,00E-21 |
| 8                  | IL18R1      | 3,68           | 4,19E-21 |
| 9                  | ETV5        | 3,02           | 4,19E-21 |
| 10                 | ALPL        | 5,53           | 2,05E-20 |
| IMM T12vsT0 (down) |             |                |          |
| 1                  | HES4        | -3,57          | 9,50E-12 |
| 2                  | SERPINE1    | -2,42          | 1,00E-11 |
| 3                  | CD1A        | -4             | 6,51E-11 |
| 4                  | ZNF618      | -2,44          | 4,93E-10 |
| 5                  | CCDC9B      | -2,71          | 1,91E-09 |
| 6                  | PLXND1      | -2,17          | 4,32E-09 |
| 7                  | VNN1        | -2,79          | 4,73E-08 |
| 8                  | IFT27       | -2,32          | 6,55E-08 |
| 9                  | TSPAN33     | -2,17          | 2,19E-07 |
| 10                 | SIGLEC1     | -2,89          | 2,64E-07 |

| IMM T40vsT0 (up)   | Gene Symbol | Log2FoldChange | Q-value  |
|--------------------|-------------|----------------|----------|
| 1                  | CATHL6      | 21,62          | 7,97E-09 |
| 2                  | SERPINB4    | 6,67           | 7,35E-06 |
| 3                  | PTPN5       | 2,25           | 2,67E-05 |
| 4                  | CCDC191     | 2,31           | 8,86E-05 |
| 5                  | IFI44       | 2,37           | 0,0006   |
| 6                  | ALOX5AP     | 2,2            | 0,001    |
| 7                  | NOL3        | 2,23           | 0,001    |
| 8                  | RSAD2       | 3,11           | 0,001    |
| 9                  | MMP9        | 3              | 0,001    |
| 10                 | OAS2        | 3,14           | 0,001    |
| IMM T40vsT0 (down) |             |                |          |
| 1                  | DAB2        | -2,62          | 0,001    |
| 2                  | IGFBP1      | -4,001         | 0,004    |

**Supplementary Table 5 Top 10 functions up regulated at I7 after DESeq2 comparison between immunized groups and the control group.**

| <b>IMM+IM vs CONT up (I7)</b> | <b>ID</b>  | <b>Name</b>                                         | <b>FDR B&amp;H</b> | <b>Genes from Input</b> | <b>Genes in Annotation</b> |
|-------------------------------|------------|-----------------------------------------------------|--------------------|-------------------------|----------------------------|
| 1                             | GO:0046903 | secretion                                           | 3.596E-22          | 118                     | 1835                       |
| 2                             | GO:0002274 | myeloid leukocyte activation                        | 1.23E-21           | 68                      | 684                        |
| 3                             | GO:0002252 | immune effector process                             | 1.23E-21           | 97                      | 1332                       |
| 4                             | GO:0002444 | myeloid leukocyte mediated immunity                 | 6.017E-20          | 59                      | 568                        |
| 5                             | GO:0002446 | neutrophil mediated immunity                        | 8.895E-19          | 54                      | 506                        |
| 6                             | GO:0002263 | cell activation involved in immune response         | 1.549E-18          | 65                      | 736                        |
| 7                             | GO:0045321 | leukocyte activation                                | 2.077E-18          | 92                      | 1386                       |
| 8                             | GO:0002275 | myeloid cell activation involved in immune response | 2.28E-18           | 56                      | 557                        |
| 9                             | GO:0043299 | leukocyte degranulation                             | 4.456E-18          | 55                      | 546                        |
| 10                            | GO:0002366 | leukocyte activation involved in immune response    | 4.456E-18          | 64                      | 732                        |

**Supplementary Table 6 Top 5 up functions at B7 after DESeq2 comparison between B7 and I0**

| Top functions/Pathways           | Category | ID       | Name                                                     | FDR B&H   | Genes from Input | Genes in Annotation |
|----------------------------------|----------|----------|----------------------------------------------------------|-----------|------------------|---------------------|
| <b>Genes up in IM group</b>      |          |          |                                                          |           |                  |                     |
| 1                                | Pathway  | 1269311  | Interferon Signaling                                     | 8.150E-8  | 22               | 202                 |
| 2                                | Pathway  | 1269312  | Interferon alpha/beta signaling                          | 5.594E-6  | 12               | 69                  |
| 3                                | Pathway  | 1269310  | Cytokine Signaling in Immune system                      | 1.130E-5  | 39               | 763                 |
| 4                                | Pathway  | 1269203  | Innate Immune System                                     | 2.105E-5  | 54               | 1312                |
| 5                                | Pathway  | 1269259  | RIG-I/MDA5 mediated induction of IFN-alpha/beta pathways | 2.219E-5  | 12               | 84                  |
| <b>Gene up in IMM group</b>      |          |          |                                                          |           |                  |                     |
| 1                                | Pathway  | 1269203  | Innate Immune System                                     | 6.395E-6  | 66               | 1312                |
| 2                                | Pathway  | 1457780  | Neutrophil degranulation                                 | 7.295E-6  | 35               | 492                 |
| 3                                | Pathway  | 1270223  | O2/CO2 exchange in erythrocytes                          | 1.159E-4  | 6                | 13                  |
| 4                                | Pathway  | 99051    | Chemokine signaling pathway                              | 2.315E-3  | 16               | 182                 |
| 5                                | Pathway  | 1269318  | Signaling by Interleukins                                | 3.046E-3  | 30               | 531                 |
| <b>Commun Genes up (CONT-IM)</b> |          |          |                                                          |           |                  |                     |
| 1                                | Pathway  | 1269340  | Hemostasis                                               | 2.438E-2  | 7                | 640                 |
| 2                                | Pathway  | 1269350  | Platelet activation, signaling and aggregation           | 2.438E-2  | 5                | 282                 |
| 3                                | Pathway  | M8066    | IL22 Soluble Receptor Signaling Pathway                  | 3.889E-2  | 2                | 16                  |
| 4                                | Pathway  | 83067    | Focal adhesion                                           | 3.889E-2  | 4                | 199                 |
| <b>Commun Genes up (IM-IMM)</b>  |          |          |                                                          |           |                  |                     |
| 1                                | Pathway  | 1457780  | Neutrophil degranulation                                 | 1.447E-17 | 49               | 492                 |
| 2                                | Pathway  | 1269203  | Innate Immune System                                     | 4.731E-11 | 69               | 1312                |
| 3                                | Pathway  | 99052    | Lysosome                                                 | 1.036E-4  | 14               | 123                 |
| 4                                | Pathway  | 1269948  | Iron uptake and transport                                | 7.795E-3  | 7                | 44                  |
| 5                                | Pathway  | MAP03070 | MAP03070 Type III secretion system                       | 7.795E-3  | 5                | 19                  |

**Supplementary Table 7 Top 10 functions up regulated at 40 hpi after DESeq2 comparison between cured and non-cured cows within the IMM immunized group.**

| <b>IMMc vs IMMnc down (T40)</b> | <b>ID</b>  | <b>Name</b>                                 | <b>FDR B&amp;H</b> | <b>Genes from Input</b> | <b>Genes in Annotation</b> |
|---------------------------------|------------|---------------------------------------------|--------------------|-------------------------|----------------------------|
| 1                               | GO:0006955 | immune response                             | 5.311E-22          | 77                      | 1572                       |
| 2                               | GO:0006952 | defense response                            | 5.928E-20          | 76                      | 1651                       |
| 3                               | GO:0045087 | innate immune response                      | 7.502E-14          | 47                      | 846                        |
| 4                               | GO:0051707 | response to other organism                  | 5.811E-12          | 48                      | 986                        |
| 5                               | GO:0043207 | response to external biotic stimulus        | 5.811E-12          | 48                      | 986                        |
| 6                               | GO:0032101 | regulation of response to external stimulus | 1.703E-11          | 48                      | 1014                       |
| 7                               | GO:0006954 | inflammatory response                       | 1.722E-11          | 40                      | 711                        |
| 8                               | GO:0009607 | response to biotic stimulus                 | 2.768E-11          | 48                      | 1027                       |
| 9                               | GO:0031347 | regulation of defense response              | 1.811E-9           | 40                      | 820                        |
| 10                              | GO:0002252 | immune effector process                     | 5.878E-9           | 40                      | 851                        |
